# Supplementary material for: Preparation of thiol-functionalized polyurethane foam and its adsorption performance for Hg(ii)
Source: Royal Society of Chemistry journal article supplement (doi:10.1039/d5ra05379j), 2025-01-01
Supplement: d5ra05379j1.pdf [file d5ra05379j1.pdf]

## Supporting Information

# Preparation of Thiol-functionalized Polyurethane Foam and Its Adsorption Performance for Hg(II)

Meixin Chen,<sup>a</sup> Lili Zhu,<sup>a</sup> Juan Jin,<sup>a</sup> Cunxin Sun<sup>a</sup> and Zhenjiang Zhang<sup>\*b</sup>

<sup>a</sup> School of Chemistry and Chemical Engineering, Ludong University, Yantai 264025, China.

<sup>b</sup> School of Materials Science and Engineering, Ludong University, Yantai 264025, China. E-mail: zhangzhj365@126.com

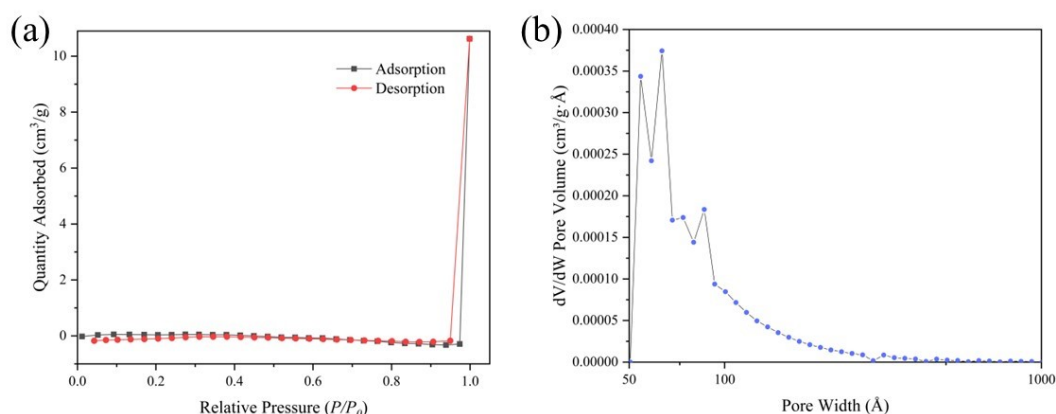

Fig. S1 (a)N<sub>2</sub> adsorption-desorption isotherms of PUF-HS, (b) Pore Volume and Pore Size Distribution of PUF-HS.

Table S1 The relative pores parameters of PUF-HS.

| BET Surface Area | Micropore volume | Average pore diameter |
|------------------|------------------|-----------------------|
| 0.1428 m²/g      | 0.000103 cm³/g   | 21.712 Å              |
